# Supplementary material
Source: PubMed Central journal article supplement (PMC3264123)
Supplement: supp_78.3.795_AEM-AEM06762-11-s01.pdf [file supp_78.3.795_AEM-AEM06762-11-s01.pdf]

Table S1. qRT-PCR primers/probes used in this study

---

|             |                                 |
|-------------|---------------------------------|
| Blon0248 R  | AGCGACGGACGAAGTGC               |
| Blon0248 F  | ATTCCGCCGTGACGCTT               |
| Blon0248 TM | 6FAM-CCACTTCCGAGGCCGGAACAT--BBQ |

---

|             |                                |
|-------------|--------------------------------|
| Blon0426 F  | GATGTGGATTCCGCAACC             |
| Blon0426 R  | AAACGCACGACCTGAGG              |
| Blon0426 TM | 6FAM-TGGCAACGTTGTCGTGGAGGC—BBQ |

---

|             |                                    |
|-------------|------------------------------------|
| Blon2335 F  | CCTGTTCAACCAGGATGAGTC              |
| Blon2335 R  | CCGTCCACGACGAAGTAG                 |
| Blon2335 TM | 6FAM-TCTGGCTTCCATCTGGCCGATCAT--BBQ |

---

|             |                                 |
|-------------|---------------------------------|
| Blon2336 F  | ATCACGCTCACCTCCC                |
| Blon2336 R  | ACATCGTCGAAGCGGAGT              |
| Blon2336 TM | 6FAM-AGCCCACGACGATCAACGCCA--BBQ |

---

|         |                      |
|---------|----------------------|
| 0346F-q | ACCATCACGGCTACCTGTTC |
| 0346R-q | ACGGGCATCCGTTTATTACA |

---

## Table S2: Crystallographic statistics

|                                          |                             |
|------------------------------------------|-----------------------------|
| Data collection                          |                             |
| Space group                              | $P2_12_12_1$                |
| Unit Cell (Å, °)                         | $a=82.61, b=106.1, c=122.4$ |
| MW Da (residue)                          | 53036 (478) <sup>1</sup>    |
| Mol (AU)                                 | 2                           |
| SeMet (AU)                               | 20                          |
| Wavelength(Å)                            | 0.9793 (peak)               |
| Resolution(Å)                            | 42.0-1.90                   |
| Number of unique reflections             | 84888 <sup>2</sup>          |
| Redundancy                               | 4.9 (4.9) <sup>3</sup>      |
| Completeness (%)                         | 99.8 (100.0) <sup>3</sup>   |
| $R_{\text{merge}}$ (%)                   | 12.5 (81.4) <sup>3</sup>    |
| $I/\sigma(I)$                            | 13.5 (1.5) <sup>3</sup>     |
| Phasing                                  |                             |
| $R_{\text{Cullis}}$ (anomalous) (%)      | 85                          |
| Figure of merit (before/after DM) (%)    | 19/89                       |
| Refinement                               |                             |
| Resolution                               | 42.0-1.90                   |
| Reflections (work/test)                  | 80222/4023                  |
| $R_{\text{crystal}}/R_{\text{free}}$ (%) | 16.2/20.5                   |
| Rms deviation from ideal geometry        | 0.006/1.003                 |
| Bond length (Å)/angle (°)                |                             |
| No.of atoms (Protein/HETATM)             | 7121/952                    |
| Mean B-value (Å <sup>2</sup> )           | 24.3/30.0                   |
| (mainchain/sidechain)                    |                             |
| Ramachandran plot statistic (%)          |                             |
| Residues in most favored regions,        | 90.2                        |
| in additional allowed regions,           | 9.2                         |
| in generously allowed regions,           | 0.1                         |
| in disallowed region                     | 0.5 <sup>4</sup>            |

<sup>1</sup> Not including cloning artifact; <sup>2</sup> Including Bijvoet pairs; <sup>3</sup> (Last resolution bin, 1.93-1.90 Å); <sup>4</sup> The residue V206 is located in a sharp turn. The residue E30 is located at the end of a helix and forms a hydrogen bond to Y443 and salt bridges to R351 and R444, respectively. The two residues in each monomer are well-defined in electron density maps.

Table S3.  $\alpha$ -L-fucosidase characteristics

| <b>Enzyme</b> | <b>Optimum expression conditions</b> | <b>Optimum pH enzyme</b> | <b>Optimum Temperature</b> |
|---------------|--------------------------------------|--------------------------|----------------------------|
| Blon_0248     | 28°C 0.5 mM IPTG 6h                  | 6.5                      | 37°C                       |
| Blon_0426     | 28°C 0.5 mM IPTG 6h                  | 6                        | 37°C                       |
| Blon_2335     | 37°C 0.5 mM IPTG 6h                  | 7.5                      | 37°C                       |
| Blon_2336     | 37°C 0.5 mM IPTG 6h                  | 6.5                      | 37°C                       |
| Blon_0346     | 28°C 0.5 mM IPTG 6h                  | 6                        | 37°C                       |

Figure S1

A.

**0248 Fucosidase**

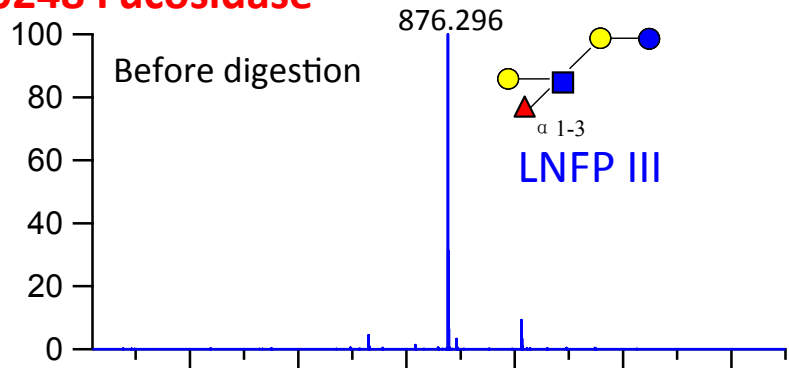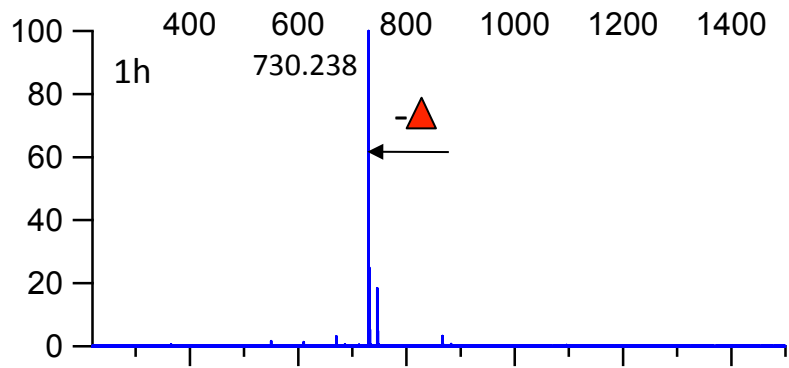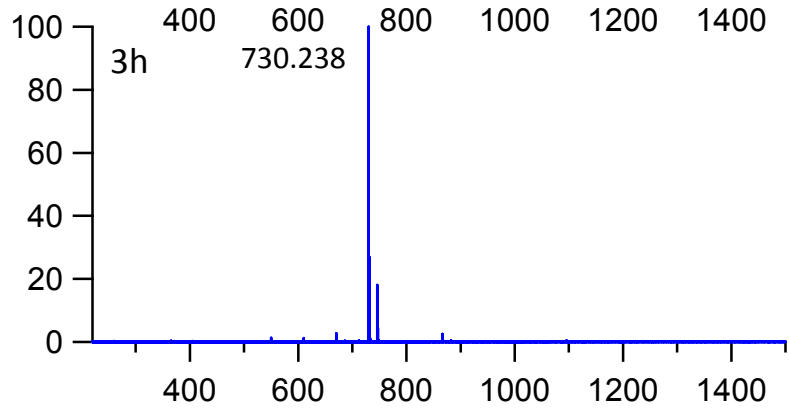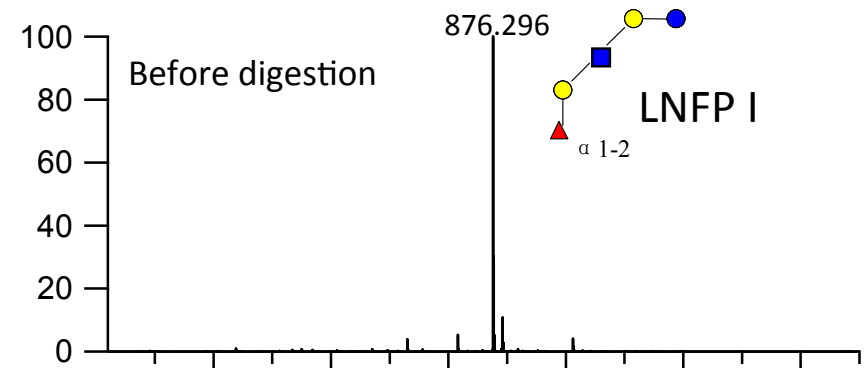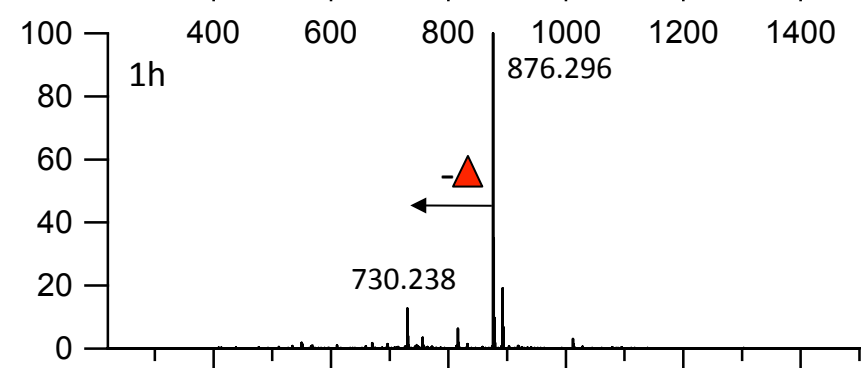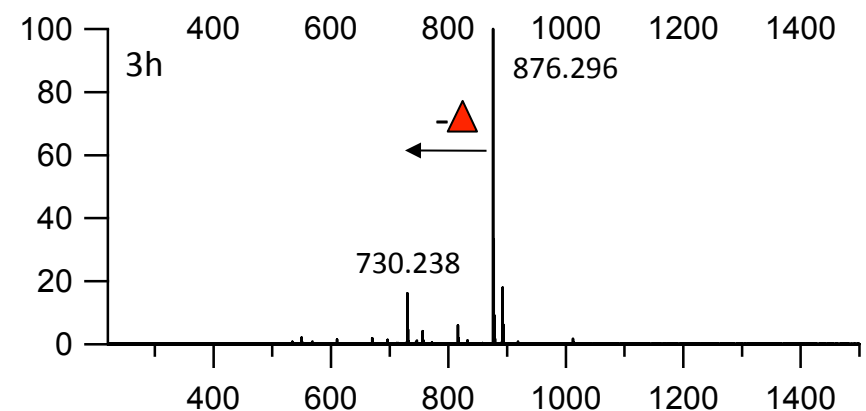

Figure S1

B.

**0426Fucosidase**

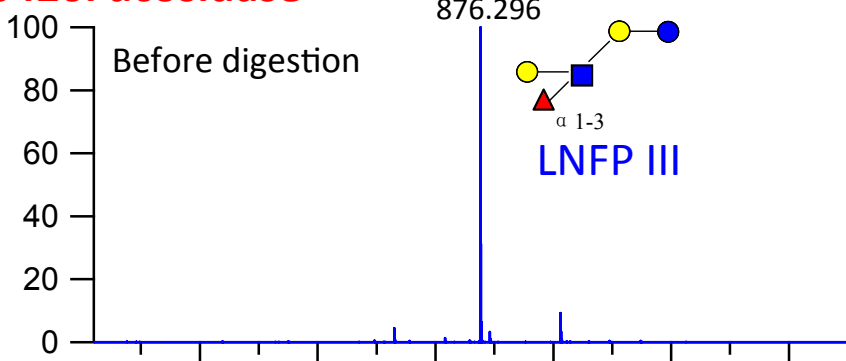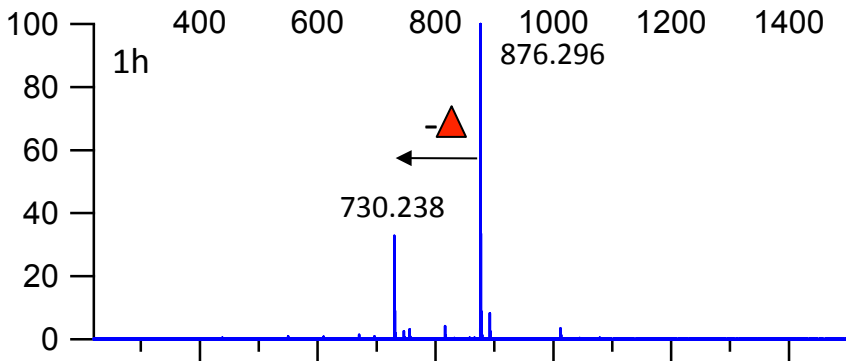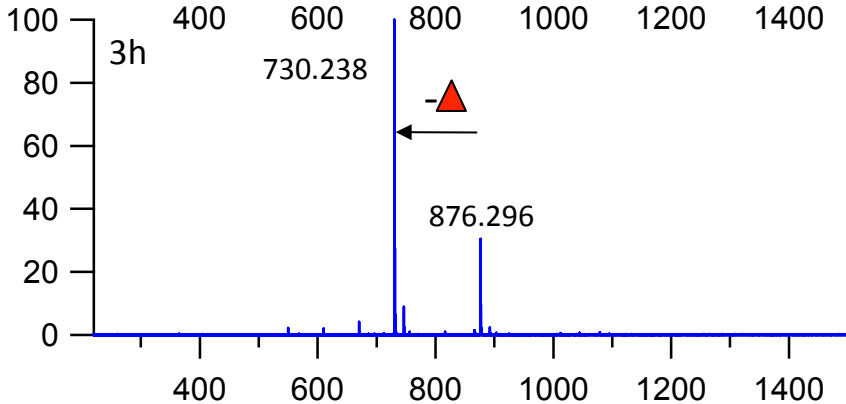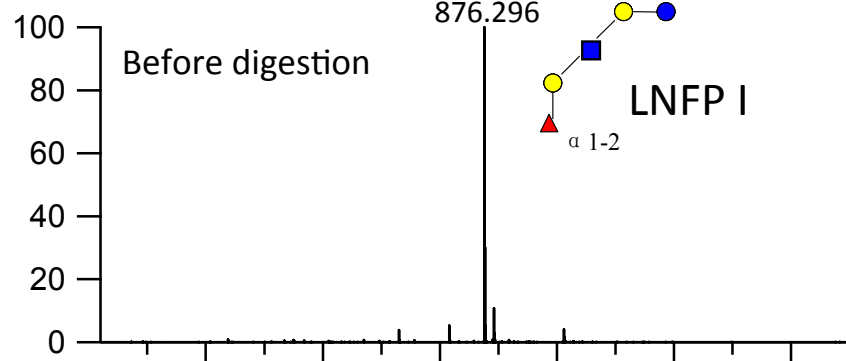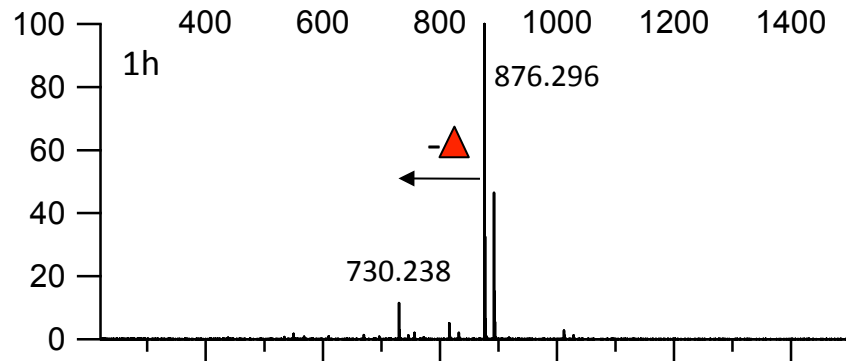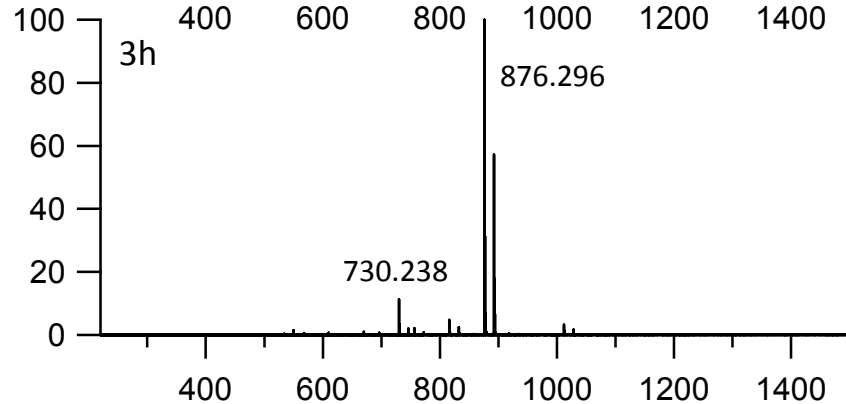

Figure S1

C.

**2335 Fucosidase**

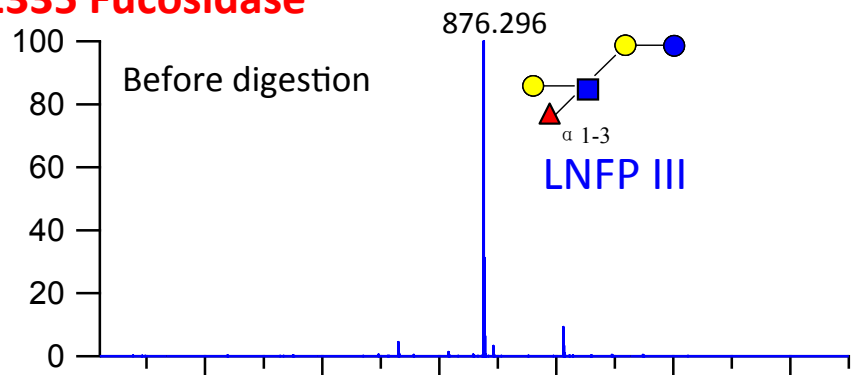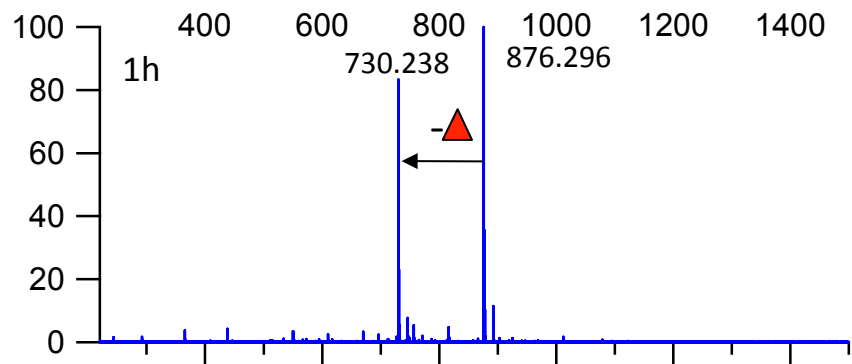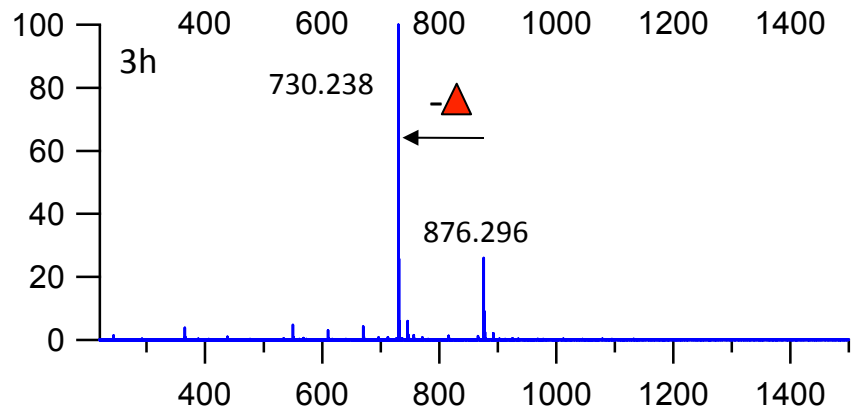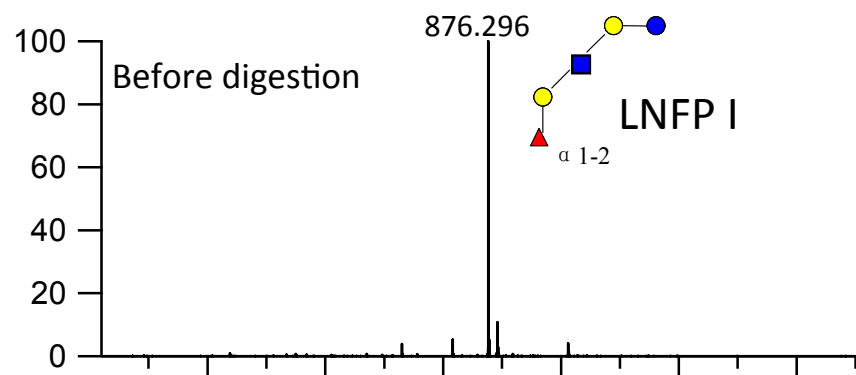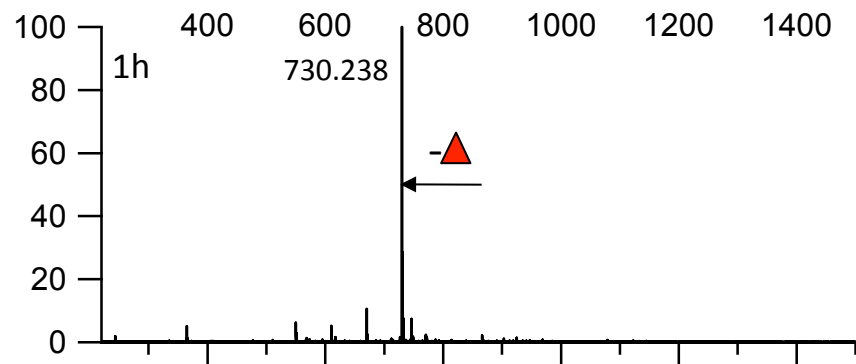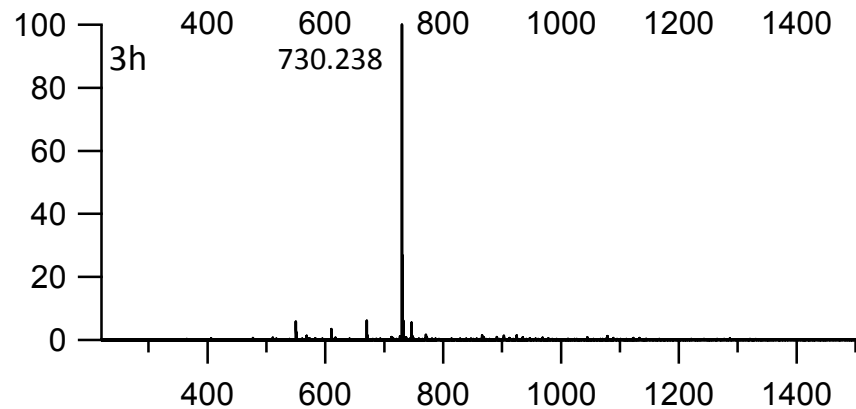

# Figure S1

## D. 2336 Fucosidase

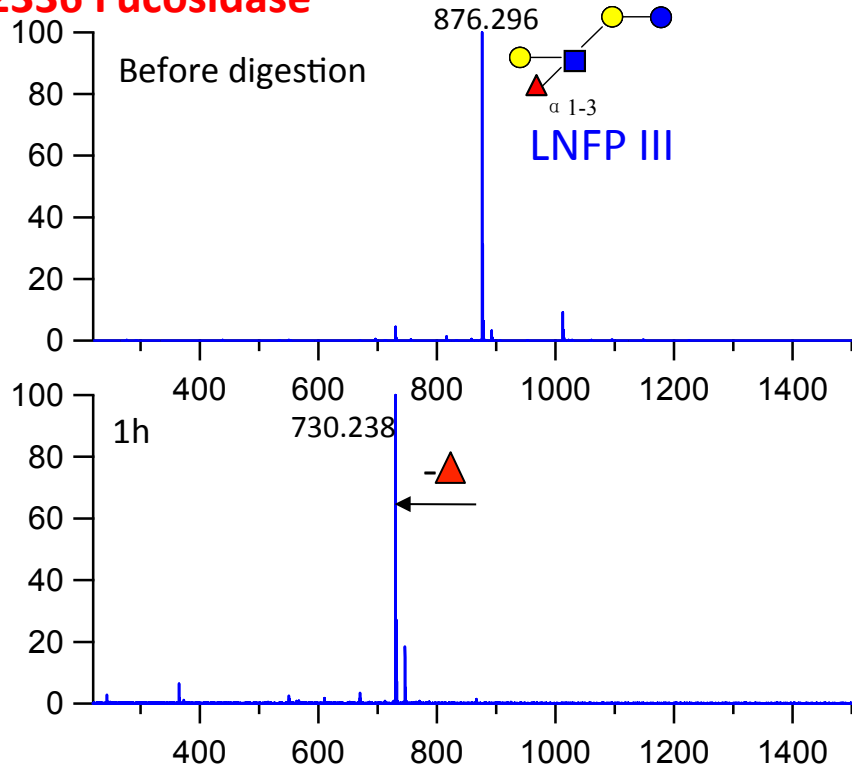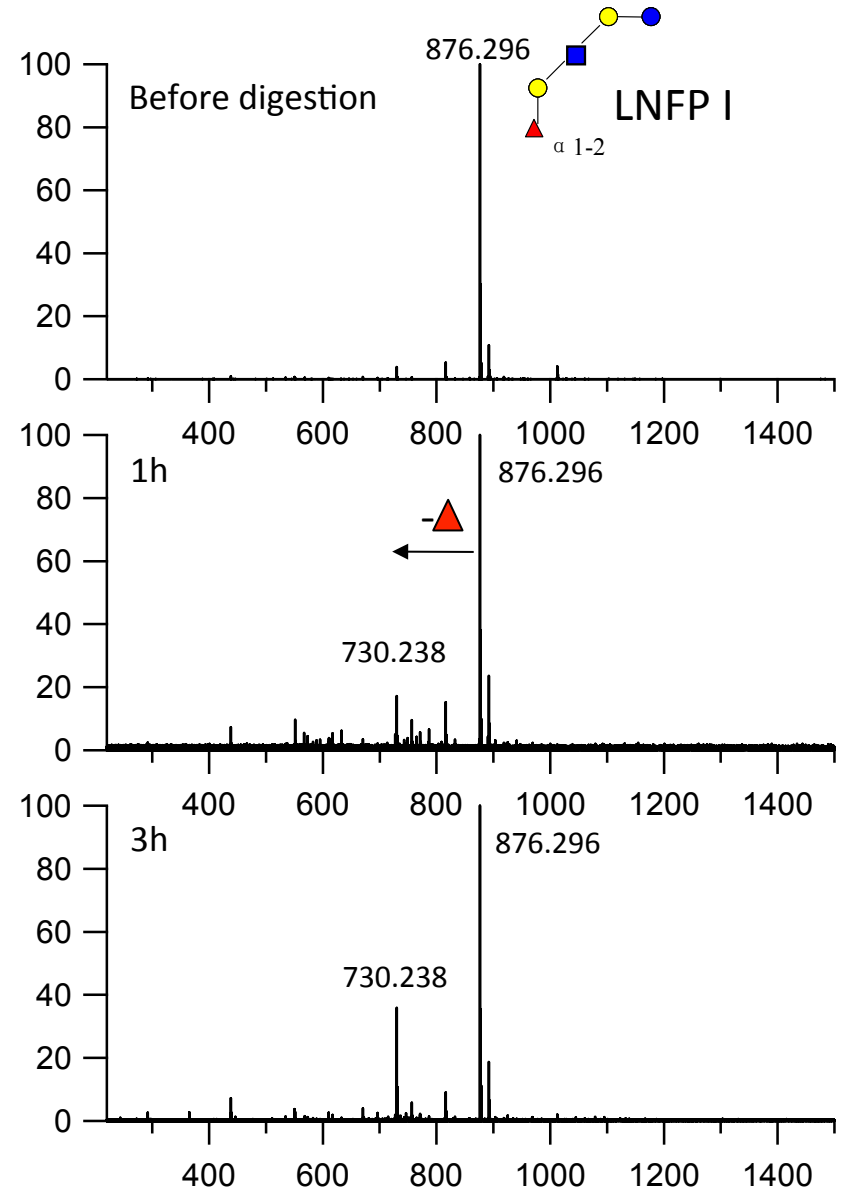

Figure S1. Digestion of fucosylated HMO with recombinant fucosidases. HMO standards were obtained from a commercial source. Incubation with Blon\_0248 (A); Blon\_0426 (B); Blon\_2335 (C); Blon\_2336 (D).

Table S4. Substrate preferences of HMO cluster fucosidases

| <b>Blon_2335</b>   | <b>Relative activity</b> |
|--------------------|--------------------------|
| 2' Fucosyl lactose | 91.90%                   |
| 3' Fucosyl lactose | 53.90%                   |
| H-disaccharide     | 100%                     |
| Lewis a            | 48.90%                   |
| Lewis x            | 26.80%                   |
| <br>               |                          |
| <b>Blon_2336</b>   |                          |
| 3' Fucosyl lactose | 100%                     |
| Lewis a            | 47.20%                   |
| Lewis x            | 70.60%                   |
